# Supplementary material for: Key Factors for Activated Carbon Adsorption of Pharmaceutical Compounds from Wastewaters: A Multivariate Modelling Approach
Source: MDPI journal article supplement (doi:10.3390/w14020166), 2022-01-08
Supplement: s1 [file s1]

Archive with 1 entries (1 files):
- water-1477780-supplementary.pdf
